# Supplementary material
Source: PubMed Central journal article supplement (PMC4675459)
Supplement: NIHMS740357-supplement-CE_module.pdf [file NIHMS740357-supplement-CE_module.pdf]

# Environmental Health and Safety Hazards Experienced by Home Health Care Providers

## A Room-by-Room Analysis

This issue of *Workplace Health & Safety* contains a Continuing Nursing Education Module on “Environmental Health and Safety Hazards Experienced by Home Health Care Providers: A Room-by-Room Analysis” 1.0 contact hour of continuing nursing education credit will be awarded by AAOHN upon successful completion of the posttest and evaluation.

A certificate will be awarded when the following requirements are met by the participant: (1) Participant logs on to the AAOHN LMS website at [www.aaohn.org/education/online-learning-center](http://www.aaohn.org/education/online-learning-center) and enrolls in the course (\$10 members; \$15 non-members); (2) The completed posttest and course evaluation are entered online at <http://www.aaohn.org> by November 2017; (3) A score of 75% (6 correct answers) is achieved by the participant.

Upon completion of this lesson, the occupational health nurse will be able to:

1. Identify room-by-room hazards to employees who provide home health care

*The American Association of Occupational Health Nurses, Inc. is an Approved Provider of continuing nursing education by the American Association of Occupational Health Nurses, Inc., an accredited approver by the American Nurses Credentialing Center's Commission on Accreditation.*

The American Association of Occupational Health Nurses, Inc. is additionally approved as a CNE provider by the California Board of Registered Nursing (#CEP9283).

Contact hours received for successful completion of the posttest and evaluation may be used for relicensure, certification, and re-certification.

**1. The most-cited occupational health and safety hazard identified by HHPs in this study was**

- a. Biohazards
- b. Violence
- c. Slips/trips/falls
- d. Cuts and abrasions

**2. In this study, the room identified as having the most hazards was the**

- a. Living room
- b. Bedroom
- c. Bathroom
- d. Kitchen

**3. Which of the following statements is true concerning this topic?**

- a. Numerous studies have identified hazards by specific locations in the home.
- b. Results of other studies on this topic were not supported by findings in this study
- c. Scant research describes hazards by specific locations in the home.
- d. This is the first study to look at hazards encountered by HHPs.

**4. The mixed methods used in this study included**

- a. A structured questionnaire and focus groups
- b. Observations of workers in the home and structured questionnaires
- c. Virtual work situations and observations of actual work situations
- d. Virtual work situations and focus groups

**5. Which of the following statements is NOT true?**

- a. Study participants received a store gift card for participating.
- b. Participants separately and independently identified hazards on individual floor plans.
- c. Participants were asked to identify their top three priority hazards.
- d. A questionnaire was used that had been validated for face and content validity.

**6. Data were coded by**

- a. The primary author
- b. Graduate students
- c. Two research team members
- d. All doctorally-prepared members of the research team

**7. Primary biohazard(s) encountered by HHPs in this study was/were**

- a. Human waste and pet droppings
- b. Tobacco smoke
- c. Mold
- d. Allergens

**8. This study is important for occupational and environmental health nursing practice because occupational and environmental health nurses can**

- a. Help home health agencies write policies to address health and safety hazards
- b. Provide training to HHPs on how to assess homes for hazards
- c. Draft templates for protocols HHPs should follow when confronted with hazards at work
- d. All of the above
